# Supplementary material for: Synthesis of Bi2Te3and (BixSb1−x)2Te3nanoparticles using the novel IL [C4mim]3[Bi3I12]
Source: Royal Society of Chemistry journal article supplement (doi:10.1039/c6dt02361d), 2016-01-01
Supplement: c6dt02361d1.pdf [file c6dt02361d1.pdf]

## Supporting Information

### Synthesis of $\text{Bi}_2\text{Te}_3$ and $(\text{Bi}_x\text{Sb}_{1-x})_2\text{Te}_3$ Nanoparticles using the novel IL $[\text{C}_4\text{mim}]_3[\text{Bi}_3\text{I}_{12}]$ .

Manuel Loor, Georg Bendt, Ulrich Hagemann, Christoph Wölper, Wilfried Assenmacher,  
Stephan Schulz\*

#### Content

**Fig. S1-S3.**  $^1\text{H}$  and  $^{13}\text{C}$  NMR spectra; IR spectra of  $[\text{C}_4\text{mim}]_3[\text{Bi}_3\text{I}_{12}]$  **1**.

**Fig. S4.** NMR spectroscopic study of the byproducts of the reaction of  $(\text{Et}_3\text{Si})_2\text{Te}$  and  $[\text{C}_4\text{mim}]_3[\text{Bi}_3\text{I}_{12}]$ .

**Fig. S5-S7.**  $^1\text{H}$  and  $^{13}\text{C}$  NMR spectra; IR spectra of  $[\text{C}_4\text{mim}]\text{I}$ .

**Fig. S8.** Color change upon heating and cooling of  $[\text{C}_4\text{mim}][\text{Bi}_3\text{I}_{12}]$  **1**.

**Fig. S9.** Temperature-dependent DSC study of **1**.

**Table S1:** Hydrogen bonds [ $\text{\AA}$ ] and  $^\circ$ ] for **1**.

**Table S2:** Inter-halide interactions [ $\text{\AA}$  and  $^\circ$ ] for **1**.

**Table S3:** EDX results from STEM spot analyses on single crystals.

Fig. S1.  $^1\text{H}$ -NMR spectrum of **1** in DMSO-d<sub>6</sub>.

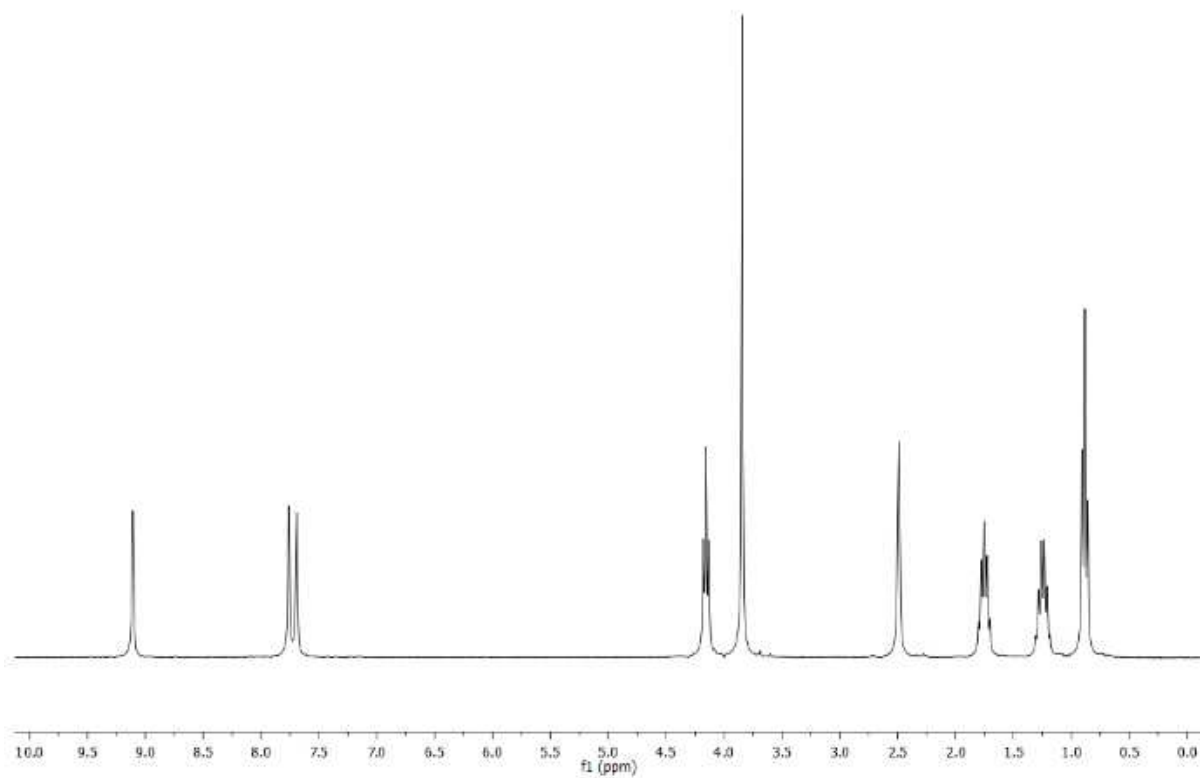

Fig. S2.  $^{13}\text{C}$ -NMR spectrum of **1** in DMSO-d<sub>6</sub>.

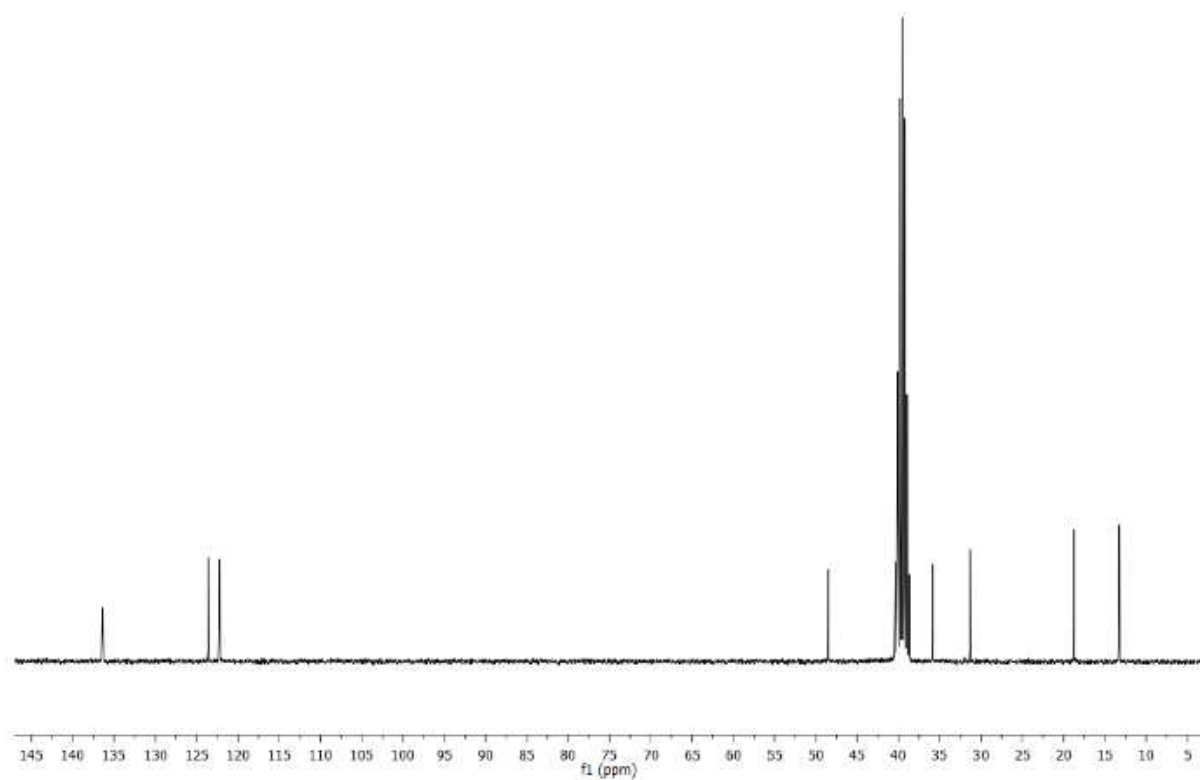

Fig. S3. IR absorption spectrum of **1**.

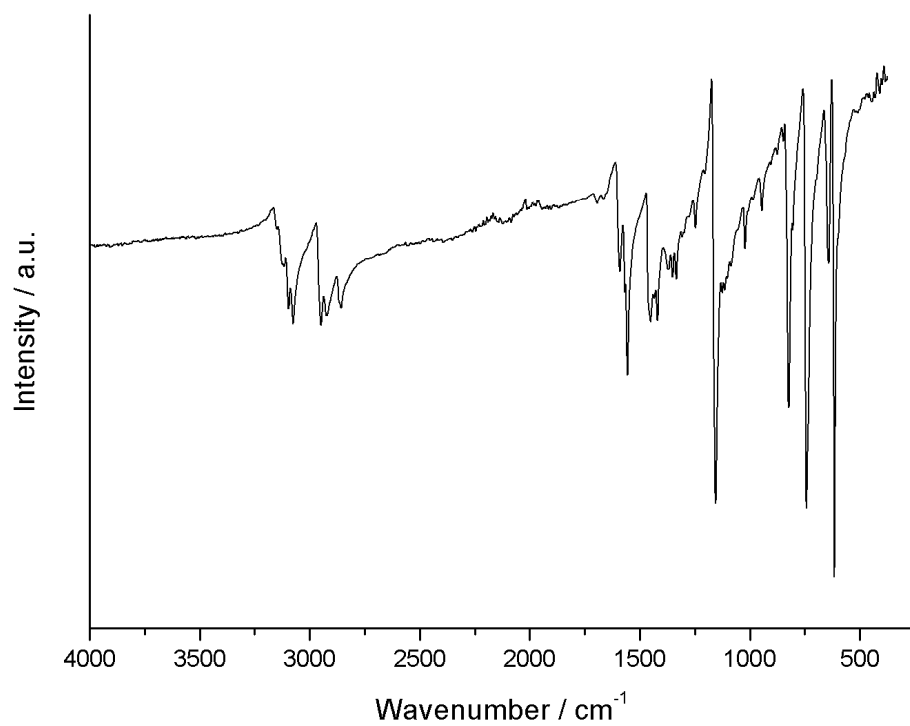

Fig. S4a.  $^1\text{H-NMR}$  spectroscopic study in  $\text{CDCl}_3$  of the byproducts of the reaction of  $(\text{Et}_3\text{Si})_2\text{Te}$  and  $[\text{C}_4\text{mim}]_3[\text{Bi}_3\text{I}_{12}]$ ; peaks marked with \* correspond to  $\text{Et}_3\text{SiI}$  and those with # to  $\text{Si}_2\text{Et}_6$ .

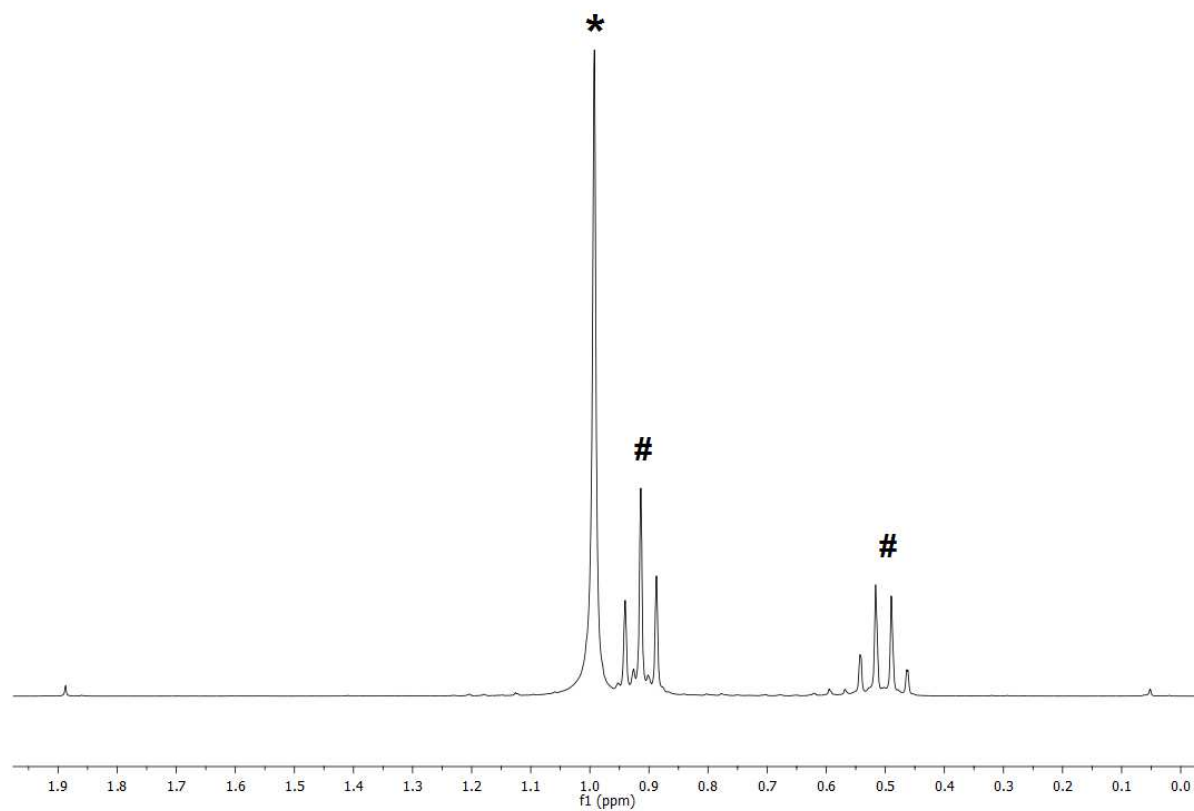

Fig. S4b.  $^{13}\text{C}$ -NMR spectroscopic study in  $\text{CDCl}_3$  of the byproducts of the reaction of  $(\text{Et}_3\text{Si})_2\text{Te}$  and  $[\text{C}_4\text{mim}]_3[\text{Bi}_3\text{I}_{12}]$ ; peaks marked with \* correspond to  $\text{Et}_3\text{SiI}$  and those with # to  $\text{Si}_2\text{Et}_6$ .

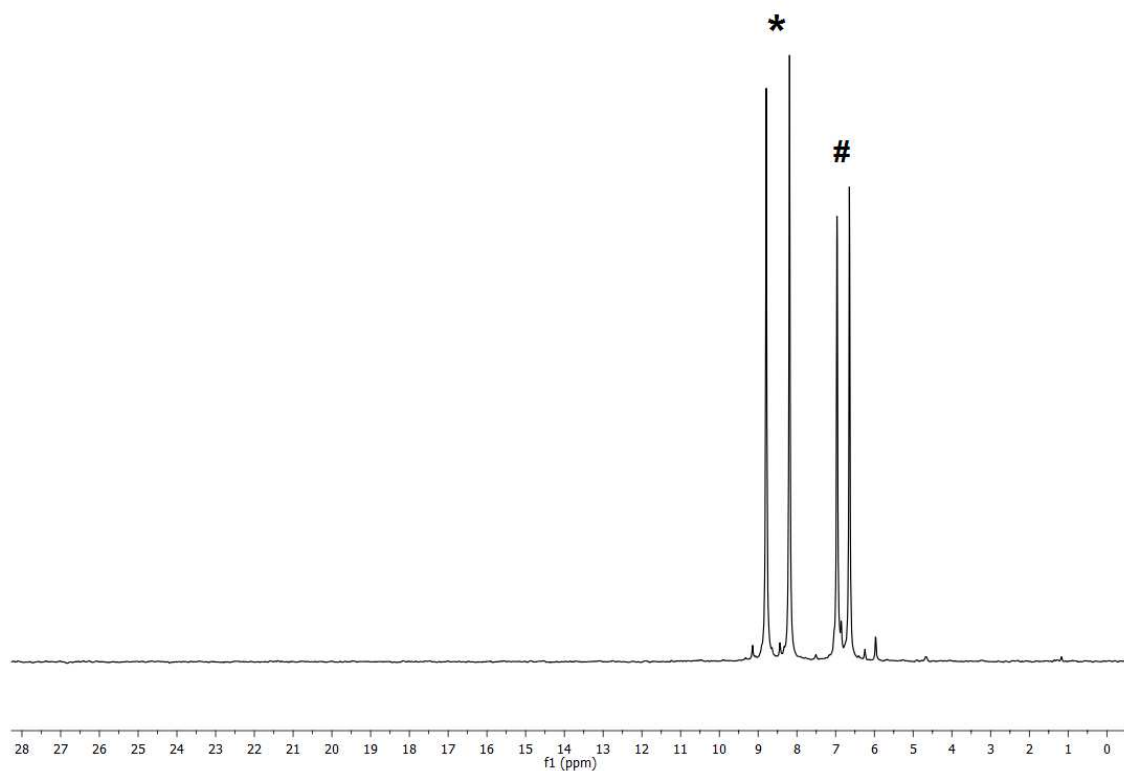

Fig. S4c.  $^{29}\text{Si}$ -NMR spectroscopic study in  $\text{CDCl}_3$  of the byproducts of the reaction of  $(\text{Et}_3\text{Si})_2\text{Te}$  and  $[\text{C}_4\text{mim}]_3[\text{Bi}_3\text{I}_{12}]$ ; peaks marked with \* correspond to  $\text{Et}_3\text{SiI}$  and those with # to  $\text{Si}_2\text{Et}_6$ .

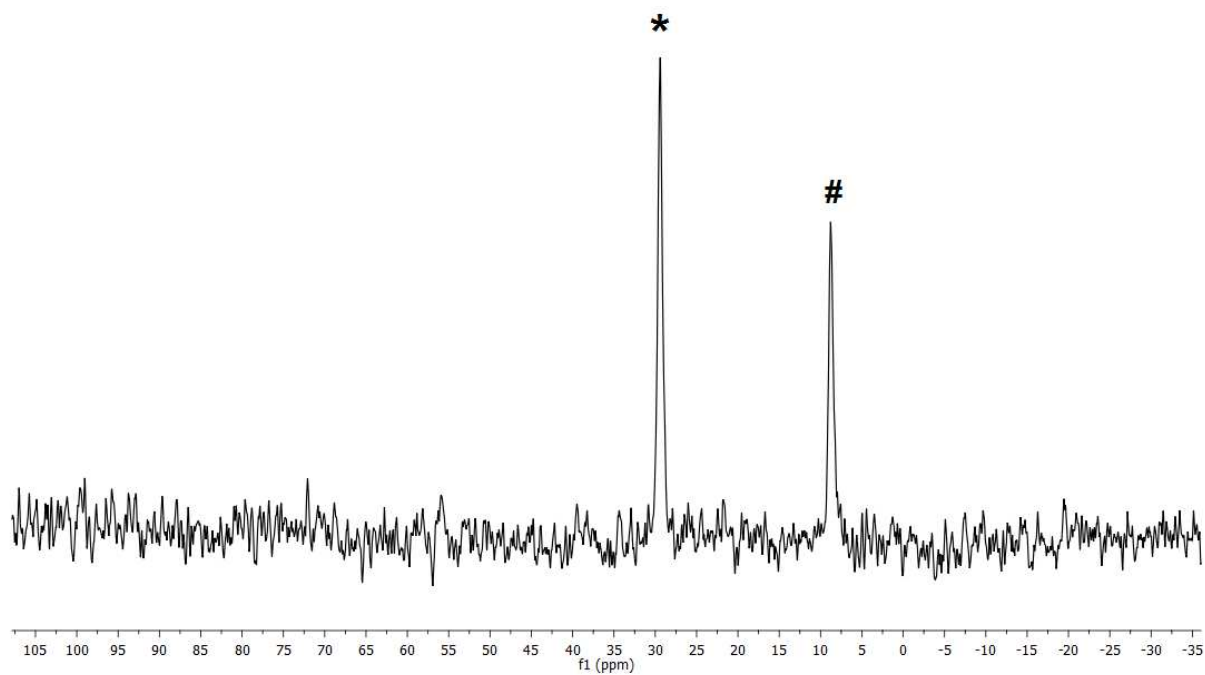

Fig. S5.  $^1\text{H}$ -NMR spectrum of  $[\text{C}_4\text{mim}][\text{I}]$  in  $\text{DMSO-d}_6$ .

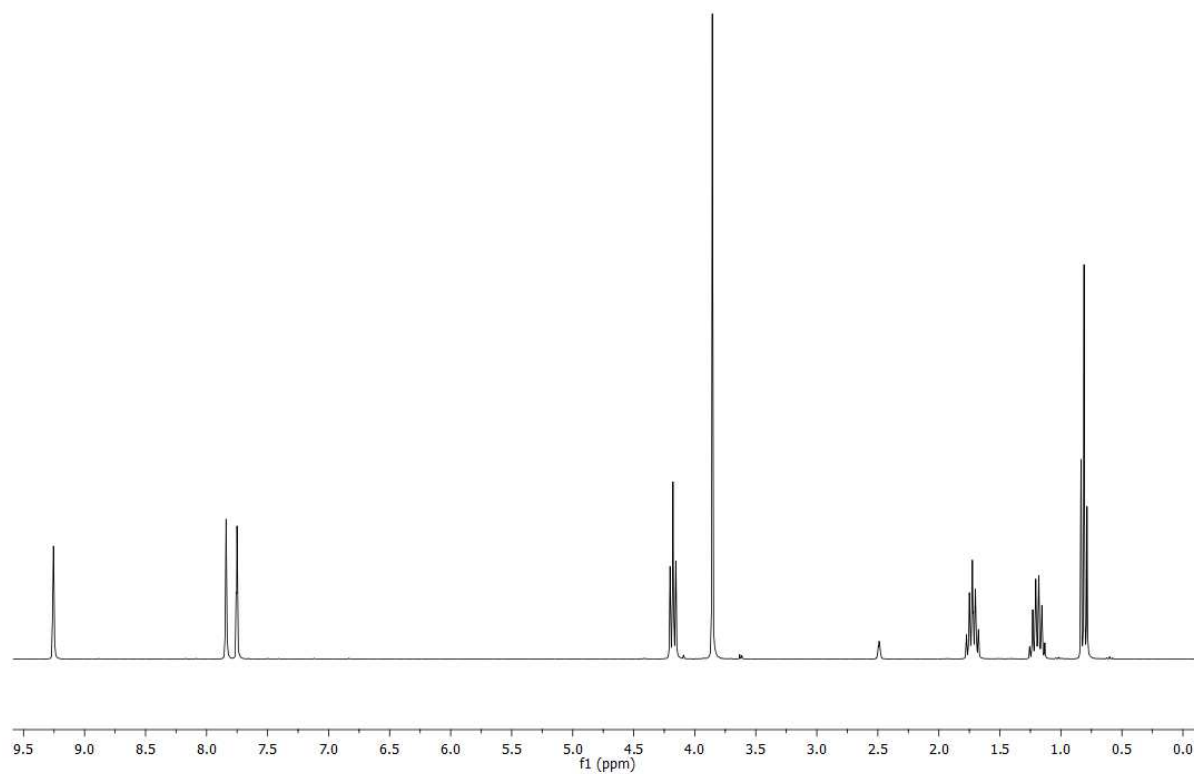

Fig. S6.  $^{13}\text{C}$ -NMR spectrum of  $[\text{C}_4\text{mim}][\text{I}]$  in  $\text{DMSO-d}_6$ .

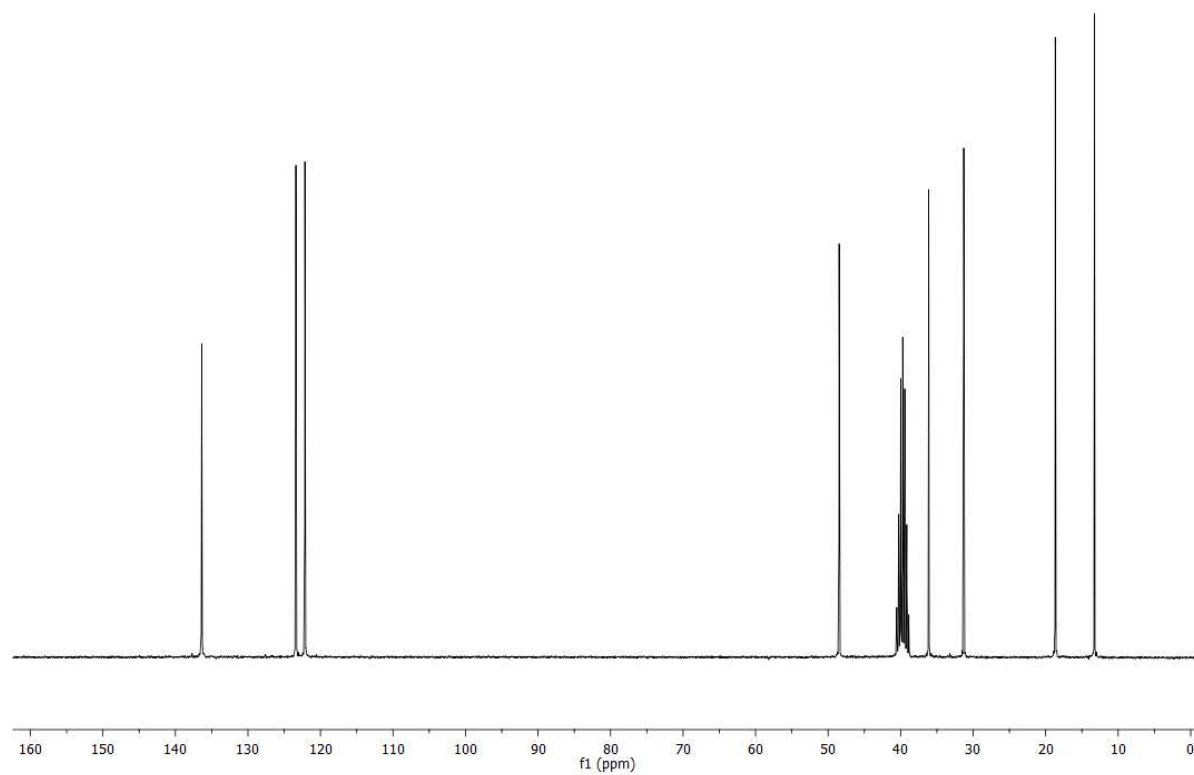

Fig. S7. IR-absorption spectrum of [C<sub>4</sub>mim][I]

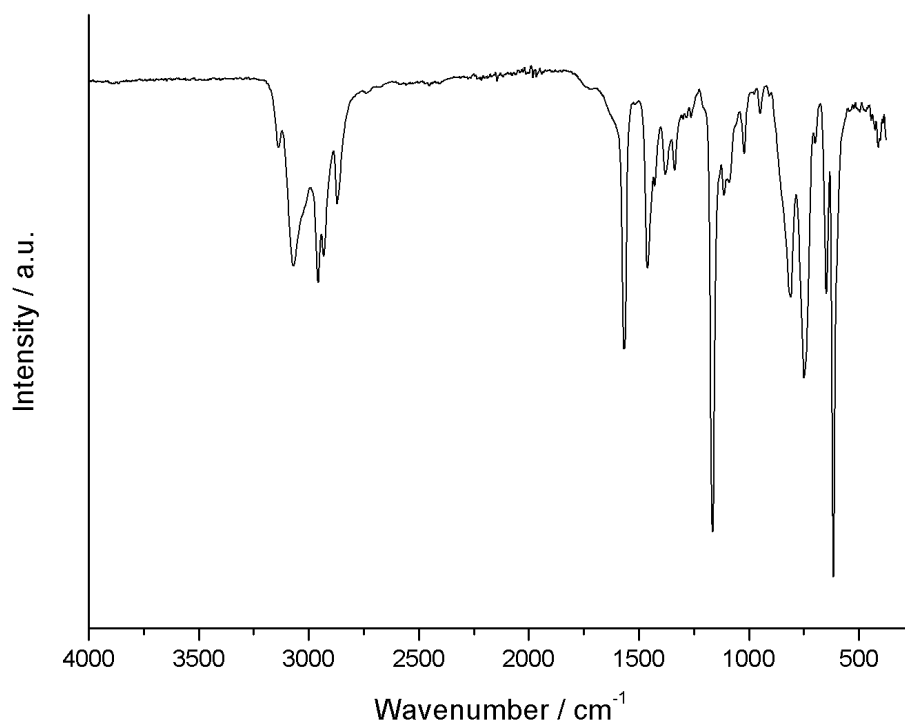

Fig. S8. Thermochromic behavior of **1**.

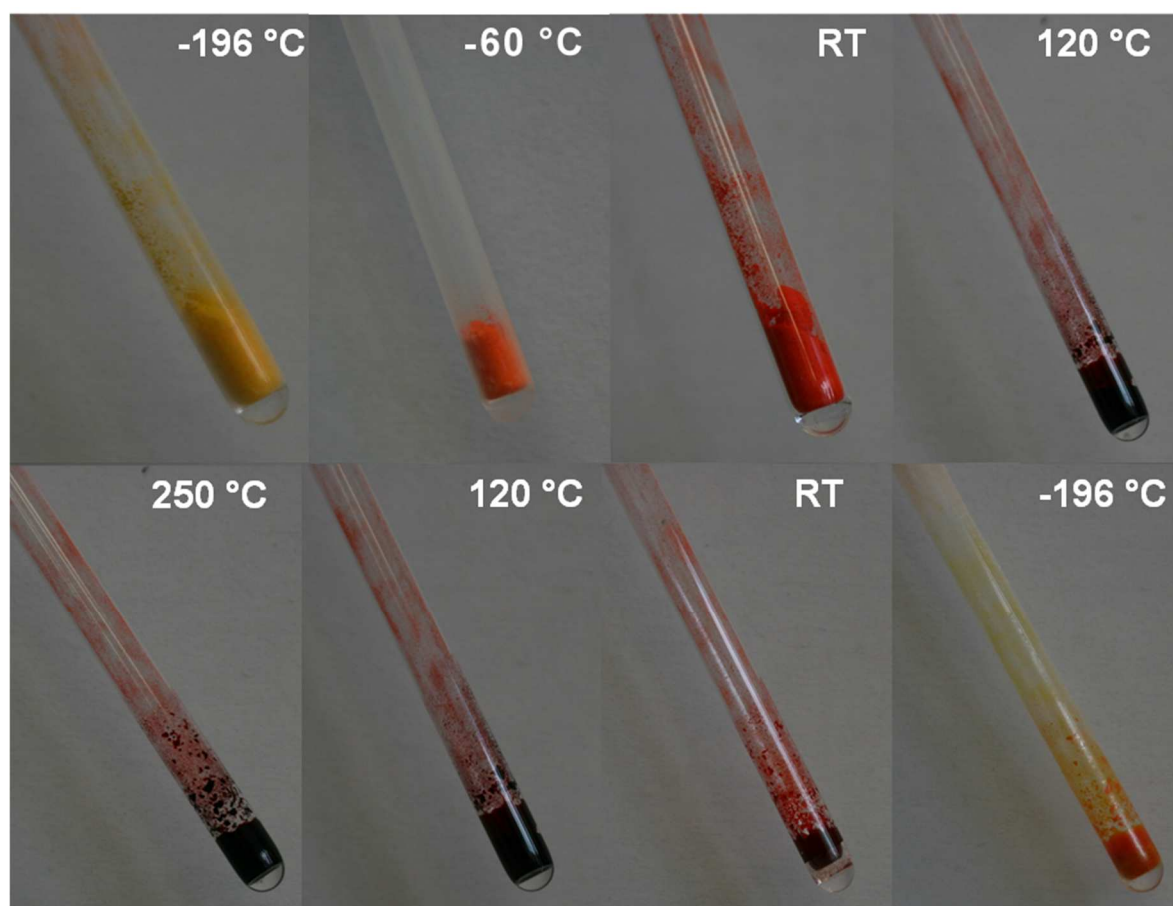

Fig. S9. Temperature-dependent DSC study of **1**.

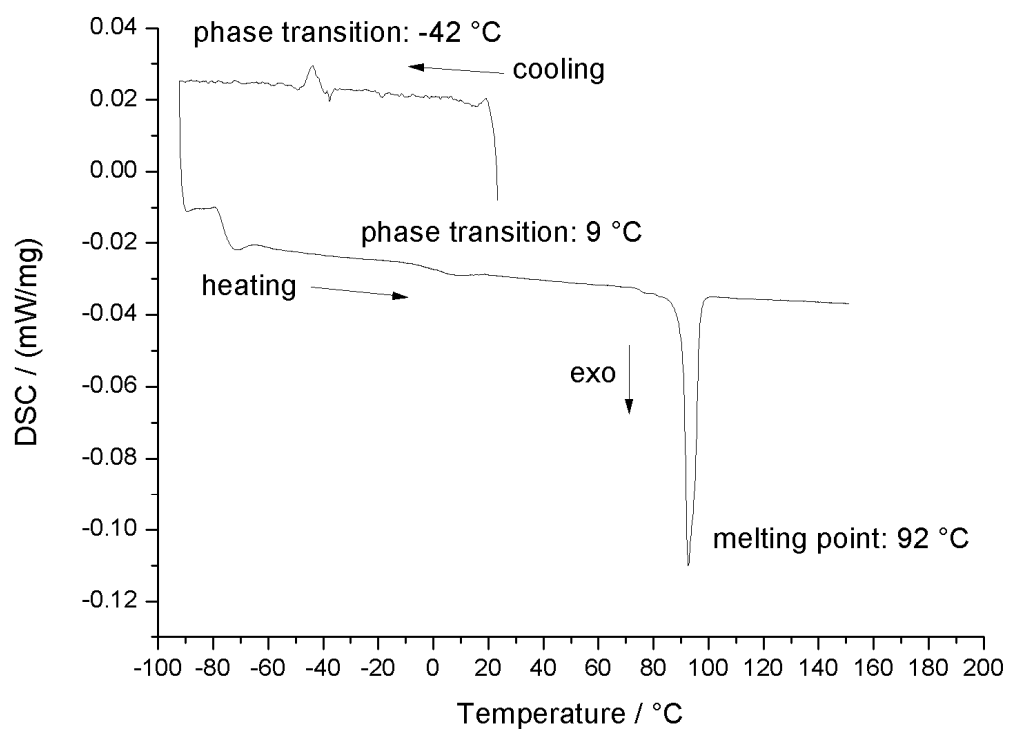

**Table S1:** Hydrogen bonds [ $\text{\AA}$ ] and  $^\circ$ ] for **1**.

| D-H...A                | d(D-H) | d(H...A) | d(D...A)  | $\angle(\text{DHA})$ |
|------------------------|--------|----------|-----------|----------------------|
| C(11)-H(11C)...I(13)   | 0.98   | 3.07     | 3.813(13) | 133.7                |
| C(13)-H(13)...I(23)#3  | 0.95   | 3.18     | 3.851(12) | 129.3                |
| C(13)-H(13)...I(24)    | 0.95   | 3.21     | 4.014(14) | 143.5                |
| C(16)-H(16A)...I(14)   | 0.99   | 3.26     | 4.089(12) | 142.9                |
| C(16)-H(16A)...I(16)   | 0.99   | 3.27     | 3.932(12) | 126.1                |
| C(21)-H(21A)...I(26)#3 | 0.98   | 3.27     | 4.035(13) | 135.9                |
| C(22)-H(22)...I(26)#3  | 0.95   | 3.09     | 3.929(12) | 148.0                |
| C(23)-H(23)...I(14)#4  | 0.95   | 3.13     | 3.981(13) | 150.3                |
| C(26)-H(26B)...I(24)#4 | 0.99   | 3.32     | 4.235(11) | 153.7                |
| C(31)-H(31A)...I(26)   | 0.98   | 3.28     | 4.168(15) | 152.4                |
| C(31)-H(31B)...I(16)#5 | 0.98   | 3.28     | 3.780(12) | 113.3                |
| C(31)-H(31C)...I(14)#4 | 0.98   | 3.31     | 4.167(13) | 147.4                |
| C(32)-H(32)...I(21)    | 0.95   | 3.23     | 3.928(13) | 131.8                |
| C(32)-H(32)...I(26)    | 0.95   | 3.11     | 3.860(12) | 137.5                |
| C(34)-H(34)...I(15)#6  | 0.95   | 3.29     | 4.128(13) | 148.1                |
| C(36)-H(36B)...I(16)#6 | 0.99   | 3.31     | 4.230(15) | 155.4                |

#3  $x, -y+3/2, z+1/2$  #4  $-x+1, y-1/2, -z+1/2$  #5  $x+1, y, z$  #6  $x+1, -y+3/2, z-1/2$

**Table S2:** Inter-halide interactions [ $\text{\AA}$ ] and  $^\circ$ ] for **1**.

| Bi-I...I-Bi                     | d(I...I)   | $\angle(\text{Bi-I...I})$ | $\angle(\text{I...I-Bi})$ |
|---------------------------------|------------|---------------------------|---------------------------|
| Bi(12)-I(16)...I(11)#7-Bi(11)#7 | 3.8510(10) | 152.58(2)                 | 150.33(3)                 |
| Bi(12)-I(16)...I(11)#7-Bi(12)#7 |            |                           | 97.76(2)                  |
| Bi(22)-I(24)...I(23)#3-Bi(22)#3 | 3.8778(10) | 175.95(3)                 | 144.51(3)                 |
| Bi(22)-I(24)...I(23)#3-Bi(21)#3 |            |                           | 137.01(2)                 |

#3  $x, -y+3/2, z+1/2$  #7  $-x, y-1/2, -z+1/2$



**Table S3:** EDX results from STEM spot analyses on single crystalsa)  $(\text{Bi}_x\text{Sb}_{1-x})_2\text{Te}_3$  with  $x = 0.25$ 

Philips/FEI CM300 UT FEG; 300 keV acc. Voltage; Thermo Noran NSS Ge-Detector

| <i>Atom%</i>    | <i>Sb-L</i>  | <i>Te-L</i>  | <i>Bi-L</i>  | <i>esd</i> | <i>Sb-L</i> | <i>Te-L</i> | <i>Bi-L</i> |
|-----------------|--------------|--------------|--------------|------------|-------------|-------------|-------------|
| 10(1)_pt1       | 26.11        | 60.68        | 13.22        | 10(1)_pt1  | 1.6         | 1.75        | 0.77        |
| 10(1)_pt2       | 26.23        | 65.88        | 7.89         | 10(1)_pt2  | 3.47        | 7.14        | 1.51        |
| 10(1)_pt3       | 24.6         | 62.19        | 13.21        | 10(1)_pt3  | 2.22        | 2.39        | 1.05        |
| 10(2)_pt1       | 27.39        | 63.65        | 8.96         | 10(2)_pt1  | 2.53        | 5.3         | 1.07        |
| 10(2)_pt2       | 25.16        | 60.9         | 13.94        | 10(2)_pt2  | 2.29        | 2.49        | 1.14        |
| 10(2)_pt3       | 24.31        | 63.32        | 12.37        | 10(2)_pt3  | 2.16        | 4.52        | 1.02        |
| 10(2)_pt4       | 28.05        | 59.06        | 12.89        | 10(2)_pt4  | 1.85        | 1.98        | 1.29        |
| 10(2)_pt5       | 24.17        | 61.08        | 14.75        | 10(2)_pt5  | 1.33        | 1.48        | 0.94        |
| 10(2)_pt6       | 29.04        | 59.3         | 11.67        | 10(2)_pt6  | 1.97        | 2.14        | 0.93        |
| 10(2)_pt7       | 23.24        | 61.47        | 15.29        | 10(2)_pt7  | 1.56        | 3.52        | 1.14        |
| 10(2)_pt8       | 24.21        | 59.62        | 16.17        | 10(2)_pt8  | 2.25        | 2.23        | 1.16        |
| 10(3)_pt1       | 30.57        | 55.29        | 14.14        | 10(3)_pt1  | 4.59        | 5.63        | 1.16        |
| 10(3)_pt2       | 23.55        | 66.51        | 9.94         | 10(3)_pt2  | 3.84        | 7.95        | 1.94        |
| 10(3)_pt4       | 30.16        | 61.56        | 8.29         | 10(3)_pt4  | 2.78        | 3.02        | 1.2         |
| 10(3)_pt5       | 28.27        | 61.6         | 10.14        | 10(3)_pt5  | 1.82        | 2.2         | 0.57        |
| 10(3)_pt6       | 28.18        | 58.59        | 13.23        | 10(3)_pt6  | 2.39        | 2.56        | 1.13        |
| 10(3)_pt7       | 26.43        | 59.15        | 14.41        | 10(3)_pt7  | 1.44        | 1.57        | 0.69        |
| 10(3)_pt8       | 30.97        | 56.21        | 12.82        | 10(3)_pt8  | 2.72        | 1.68        | 0.92        |
| <b>Average:</b> | <b>26.70</b> | <b>60.89</b> | <b>12.41</b> |            | <b>2.38</b> | <b>3.31</b> | <b>1.09</b> |

b)  $(\text{Bi}_x\text{Sb}_{1-x})_2\text{Te}_3$  with  $x = 0.5$ 

Philips/FEI CM300 UT FEG; 300 keV acc. Voltage; Thermo Noran NSS Ge-Detector (yellow cell color)

Philips/FEI CM30 T Lab<sub>6</sub>; 300 keV acc. Voltage; Thermo Noran NSS Si(Li)-Detector (white cell color)

| <i>Atom%</i> | <i>Sb-L</i> | <i>Te-L</i> | <i>Bi-L</i> | <i>esd</i> | <i>Sb-L</i> | <i>Te-L</i> | <i>Bi-L</i> |
|--------------|-------------|-------------|-------------|------------|-------------|-------------|-------------|
| 01(1)_pt1    | 16.73       | 56.46       | 26.81       | 01(1)_pt1  | 2           | 4.27        | 1.46        |
| 01(1)_pt2    | 15.43       | 62.01       | 22.56       | 01(1)_pt2  | 0.92        | 1.02        | 0.84        |
| 01(1)_pt3    | 15.25       | 61.13       | 23.63       | 01(1)_pt3  | 0.89        | 2.17        | 0.66        |
| 01(1)_pt4    | 14.01       | 61.97       | 24.02       | 01(1)_pt4  | 2.28        | 2.27        | 2.23        |
| 01(2)_pt1    | 16.03       | 58.31       | 25.66       | 01(2)_pt1  | 1.91        | 4           | 1.33        |
| 01(2)_pt2    | 16.07       | 60.58       | 23.34       | 01(2)_pt2  | 1.33        | 1.31        | 1.01        |
| 01(2)_pt3    | 16.6        | 59.8        | 23.6        | 01(2)_pt3  | 1.57        | 1.57        | 1.17        |
| 01(2)_pt4    | 16.87       | 60.65       | 22.48       | 01(2)_pt4  | 1.83        | 1.82        | 1.28        |
| 01(2)_pt6    | 16.81       | 60.2        | 22.99       | 01(2)_pt6  | 1.82        | 1.8         | 1.31        |
| 01(3)_pt1    | 17.12       | 59.27       | 23.61       | 01(3)_pt1  | 1.14        | 1.15        | 0.88        |
| 01(3)_pt2    | 16.28       | 58.65       | 25.07       | 01(3)_pt2  | 1.61        | 0.97        | 0.63        |
| 01(3)_pt3    | 16.39       | 60.57       | 23.04       | 01(3)_pt3  | 1.38        | 1.71        | 0.63        |
| 01(3)_pt4    | 17          | 59.51       | 23.5        | 01(3)_pt4  | 1.3         | 1.61        | 0.59        |

|                  |              |              |              |
|------------------|--------------|--------------|--------------|
| <i>01(3)_pt5</i> | 15.53        | 57.48        | 26.98        |
| <i>01(3)_pt6</i> | 16.34        | 59.6         | 24.06        |
| <i>1(1)_pt1</i>  | 14.78        | 61.97        | 23.25        |
| <i>1(1)_pt2</i>  | 15.76        | 59.92        | 24.32        |
| <i>1(1)_pt3</i>  | 14.05        | 63.11        | 22.84        |
| <i>1(1)_pt4</i>  | 34.87        | 47.39        | 17.75        |
| <i>1(1)_pt5</i>  | 16.75        | 61.4         | 21.85        |
| <i>1(2)_pt1</i>  | 20.08        | 62.13        | 17.8         |
| <i>1(2)_pt3</i>  | 18.5         | 58.65        | 22.86        |
| <i>1(2)_pt4</i>  | 16.18        | 64.99        | 18.82        |
| <i>1(2)_pt5</i>  | 17.71        | 60.25        | 22.03        |
| <i>1(3)_pt1</i>  | 14.55        | 63.74        | 21.71        |
| <i>1(3)_pt2</i>  | 14.34        | 64.87        | 20.79        |
| <b>Average:</b>  | <b>16.92</b> | <b>60.18</b> | <b>22.90</b> |

|                  |             |             |             |
|------------------|-------------|-------------|-------------|
| <i>01(3)_pt5</i> | 1.24        | 2.66        | 1.18        |
| <i>01(3)_pt6</i> | 0.61        | 0.67        | 0.47        |
| <i>1(1)_pt1</i>  | 1.59        | 3.67        | 1.41        |
| <i>1(1)_pt2</i>  | 2.72        | 3.23        | 1.24        |
| <i>1(1)_pt3</i>  | 2.57        | 5.54        | 1.55        |
| <i>1(1)_pt4</i>  | 2.43        | 2.83        | 0.94        |
| <i>1(1)_pt5</i>  | 1.3         | 2.77        | 1.07        |
| <i>1(2)_pt1</i>  | 2.01        | 4.29        | 1.11        |
| <i>1(2)_pt3</i>  | 2.47        | 2.93        | 1.08        |
| <i>1(2)_pt4</i>  | 1.97        | 2.07        | 1.14        |
| <i>1(2)_pt5</i>  | 2.64        | 3.16        | 1.18        |
| <i>1(3)_pt1</i>  | 2.83        | 5.97        | 1.74        |
| <i>1(3)_pt2</i>  | 1.73        | 3.63        | 1.04        |
|                  | <b>1.77</b> | <b>2.66</b> | <b>1.12</b> |

c)  $(\text{Bi}_x\text{Sb}_{1-x})_2\text{Te}_3$  with  $x = 0.75$

Philips/FEI CM300 UT FEG; 300 keV acc. Voltage; Thermo Noran NSS Ge-Detector

| <b>Atom%</b>     | <b>Sb-L</b> | <b>Te-L</b>  | <b>Bi-L</b>  |
|------------------|-------------|--------------|--------------|
| <i>11(1)_pt1</i> | 6.63        | 57.99        | 35.37        |
| <i>11(1)_pt2</i> | 4.61        | 59.22        | 36.17        |
| <i>11(1)_pt3</i> | 8.43        | 59.81        | 31.76        |
| <i>11(1)_pt4</i> | 8.93        | 59.8         | 31.27        |
| <i>11(3)_pt1</i> | 9.31        | 62.02        | 28.68        |
| <i>11(3)_pt2</i> | 6.97        | 59.86        | 33.17        |
| <i>11(3)_pt3</i> | 6.08        | 61.08        | 32.84        |
| <i>11(4)_pt2</i> | 10.44       | 56.9         | 32.66        |
| <i>11(4)_pt3</i> | 5.9         | 61.37        | 32.73        |
| <b>Average:</b>  | <b>7.48</b> | <b>59.78</b> | <b>32.74</b> |

| <b>esd</b>       | <b>Sb-L</b> | <b>Te-L</b> | <b>Bi-L</b> |
|------------------|-------------|-------------|-------------|
| <i>11(1)_pt1</i> | 1.34        | 2.92        | 1.48        |
| <i>11(1)_pt2</i> | 1.35        | 2.92        | 1.47        |
| <i>11(1)_pt3</i> | 1.22        | 2.63        | 1.26        |
| <i>11(1)_pt4</i> | 2.6         | 2.66        | 2.74        |
| <i>11(3)_pt1</i> | 2.28        | 4.88        | 2.3         |
| <i>11(3)_pt2</i> | 1.57        | 3.4         | 1.64        |
| <i>11(3)_pt3</i> | 1.46        | 3.18        | 1.62        |
| <i>11(4)_pt2</i> | 1.47        | 1.56        | 1.62        |
| <i>11(4)_pt3</i> | 1.89        | 4.03        | 2.01        |
|                  | <b>1.69</b> | <b>3.13</b> | <b>1.79</b> |
